# Supplementary material for: Analysis of Japanese consumers' attitudes toward the digital transformation of OTC medicine purchase behavior and eHealth literacy: an online survey for digital experience design
Source: PubMed Central journal article supplement (PMC10244771; doi:10.3389/fdgth.2023.1173229), 2023-05-24
Supplement: Datasheet1.pdf [file Datasheet1.pdf]

## *Supplementary Material*

### 1 List of survey questions

| <b>Behaviors and preferences regarding OTC medicine purchase</b> |                                                                                                                                                                                                                                                                                                                                                                                                                                                                                                                                                                                                                                                                                                                                                                                                                                                                                                                                                                                                                                                                                                                                                                                                                                                                                                                                                                                                                      |
|------------------------------------------------------------------|----------------------------------------------------------------------------------------------------------------------------------------------------------------------------------------------------------------------------------------------------------------------------------------------------------------------------------------------------------------------------------------------------------------------------------------------------------------------------------------------------------------------------------------------------------------------------------------------------------------------------------------------------------------------------------------------------------------------------------------------------------------------------------------------------------------------------------------------------------------------------------------------------------------------------------------------------------------------------------------------------------------------------------------------------------------------------------------------------------------------------------------------------------------------------------------------------------------------------------------------------------------------------------------------------------------------------------------------------------------------------------------------------------------------|
| Part 1: Behavior of accessing OTC medicine                       | <p>(i) How do you usually purchase OTC medicines?</p> <ul style="list-style-type: none"> <li>- Purchase at pharmacies or drug stores</li> <li>- Purchase on the Internet</li> <li>- Other (e.g., convenience stores)</li> <li>- I have not purchased OTC medicines</li> </ul> <p>(ii) Multiple choice questions about the reasons for the specific approach above (linked to question (i)).</p> <ul style="list-style-type: none"> <li>- Safety</li> <li>- Privacy</li> <li>- Reliability</li> <li>- Anonymity</li> <li>- Communication with pharmacist</li> <li>- Guidance for intake</li> <li>- 24-hour availability</li> <li>- Wide-spread availability</li> <li>- Convenience</li> <li>- Others</li> </ul> <p>(iii) How do you choose OTC medicines? Respondents were asked to rate each given of response from “very often” = 4 to “never” = 0</p> <ul style="list-style-type: none"> <li>- Choose based on my own experiences</li> <li>- Choose based on the advice of a pharmacist</li> <li>- Choose by consulting my family doctor</li> <li>- Choose after searching for information on the Internet</li> <li>- Choose based on advice from family and friends</li> </ul> <p>(iv) In-store, which do you think is a better way to select OTC medicine: directly from the shelves or by searching on the screen of a computer or tablet device?” Respondents were asked to provide details in a text box.</p> |
| Part 2: Preferred mode of receiving medical guidance             | <p>(i) What is the best way to communicate with a pharmacist to get guidance on medicine?</p> <ul style="list-style-type: none"> <li>- In-person at a pharmacy</li> <li>- Online</li> <li>- Either</li> </ul>                                                                                                                                                                                                                                                                                                                                                                                                                                                                                                                                                                                                                                                                                                                                                                                                                                                                                                                                                                                                                                                                                                                                                                                                        |

|                                                           |                                                                                                                                                                                                                                                                                                                                                                                                                                                                                                                                                                                                                                                                                                                                                                                                                                                                                                                                                                                                                         |
|-----------------------------------------------------------|-------------------------------------------------------------------------------------------------------------------------------------------------------------------------------------------------------------------------------------------------------------------------------------------------------------------------------------------------------------------------------------------------------------------------------------------------------------------------------------------------------------------------------------------------------------------------------------------------------------------------------------------------------------------------------------------------------------------------------------------------------------------------------------------------------------------------------------------------------------------------------------------------------------------------------------------------------------------------------------------------------------------------|
|                                                           | (ii) What is your reason? Respondents were asked to provide details in a text box.                                                                                                                                                                                                                                                                                                                                                                                                                                                                                                                                                                                                                                                                                                                                                                                                                                                                                                                                      |
| Part 3: Obtaining information on OTC medicine             | <p>(i) How often do you get information about OTC medicine from the sources below? Respondents were asked to rate each given of response from “very often” = 4 to “never” = 0.</p> <ul style="list-style-type: none"> <li>- TV advertisement</li> <li>- Newspaper advertisement</li> <li>- Magazine advertisement</li> <li>- Internet advertisement</li> <li>- Website of a pharmaceutical manufacturer</li> <li>- Internet search engines (e.g., Yahoo! and Google)</li> <li>- Side effect database of the Pharmaceuticals and Medical Devices Agency (PDMA)</li> <li>- Academic societies (e.g., Japan Pharmaceutical Association)</li> <li>- Private sector (e-pharma)</li> <li>- Pharmacists</li> <li>- Doctors</li> <li>- Friends</li> <li>- Family</li> </ul> <p>(ii) Have you ever used a smartphone to collect information when purchasing OTC medicine at stores such as local pharmacies and drug stores?<br/>Respondents were asked to rate each given of response from “very often” = 4 to “never” = 0.</p> |
| <b>eHealth literacy</b>                                   |                                                                                                                                                                                                                                                                                                                                                                                                                                                                                                                                                                                                                                                                                                                                                                                                                                                                                                                                                                                                                         |
| Japanese version of the eHealth Literacy Scale (J-eHEALS) |                                                                                                                                                                                                                                                                                                                                                                                                                                                                                                                                                                                                                                                                                                                                                                                                                                                                                                                                                                                                                         |
| <b>Demographic questions</b>                              |                                                                                                                                                                                                                                                                                                                                                                                                                                                                                                                                                                                                                                                                                                                                                                                                                                                                                                                                                                                                                         |
| Age and Gender                                            |                                                                                                                                                                                                                                                                                                                                                                                                                                                                                                                                                                                                                                                                                                                                                                                                                                                                                                                                                                                                                         |
